# Supplementary material for: Dental pulp stem cells overexpressing hepatocyte growth factor facilitate the repair of DSS-induced ulcerative colitis
Source: PubMed Central journal article supplement (PMC7792189; doi:10.1186/s13287-020-02098-4), 2021-01-07

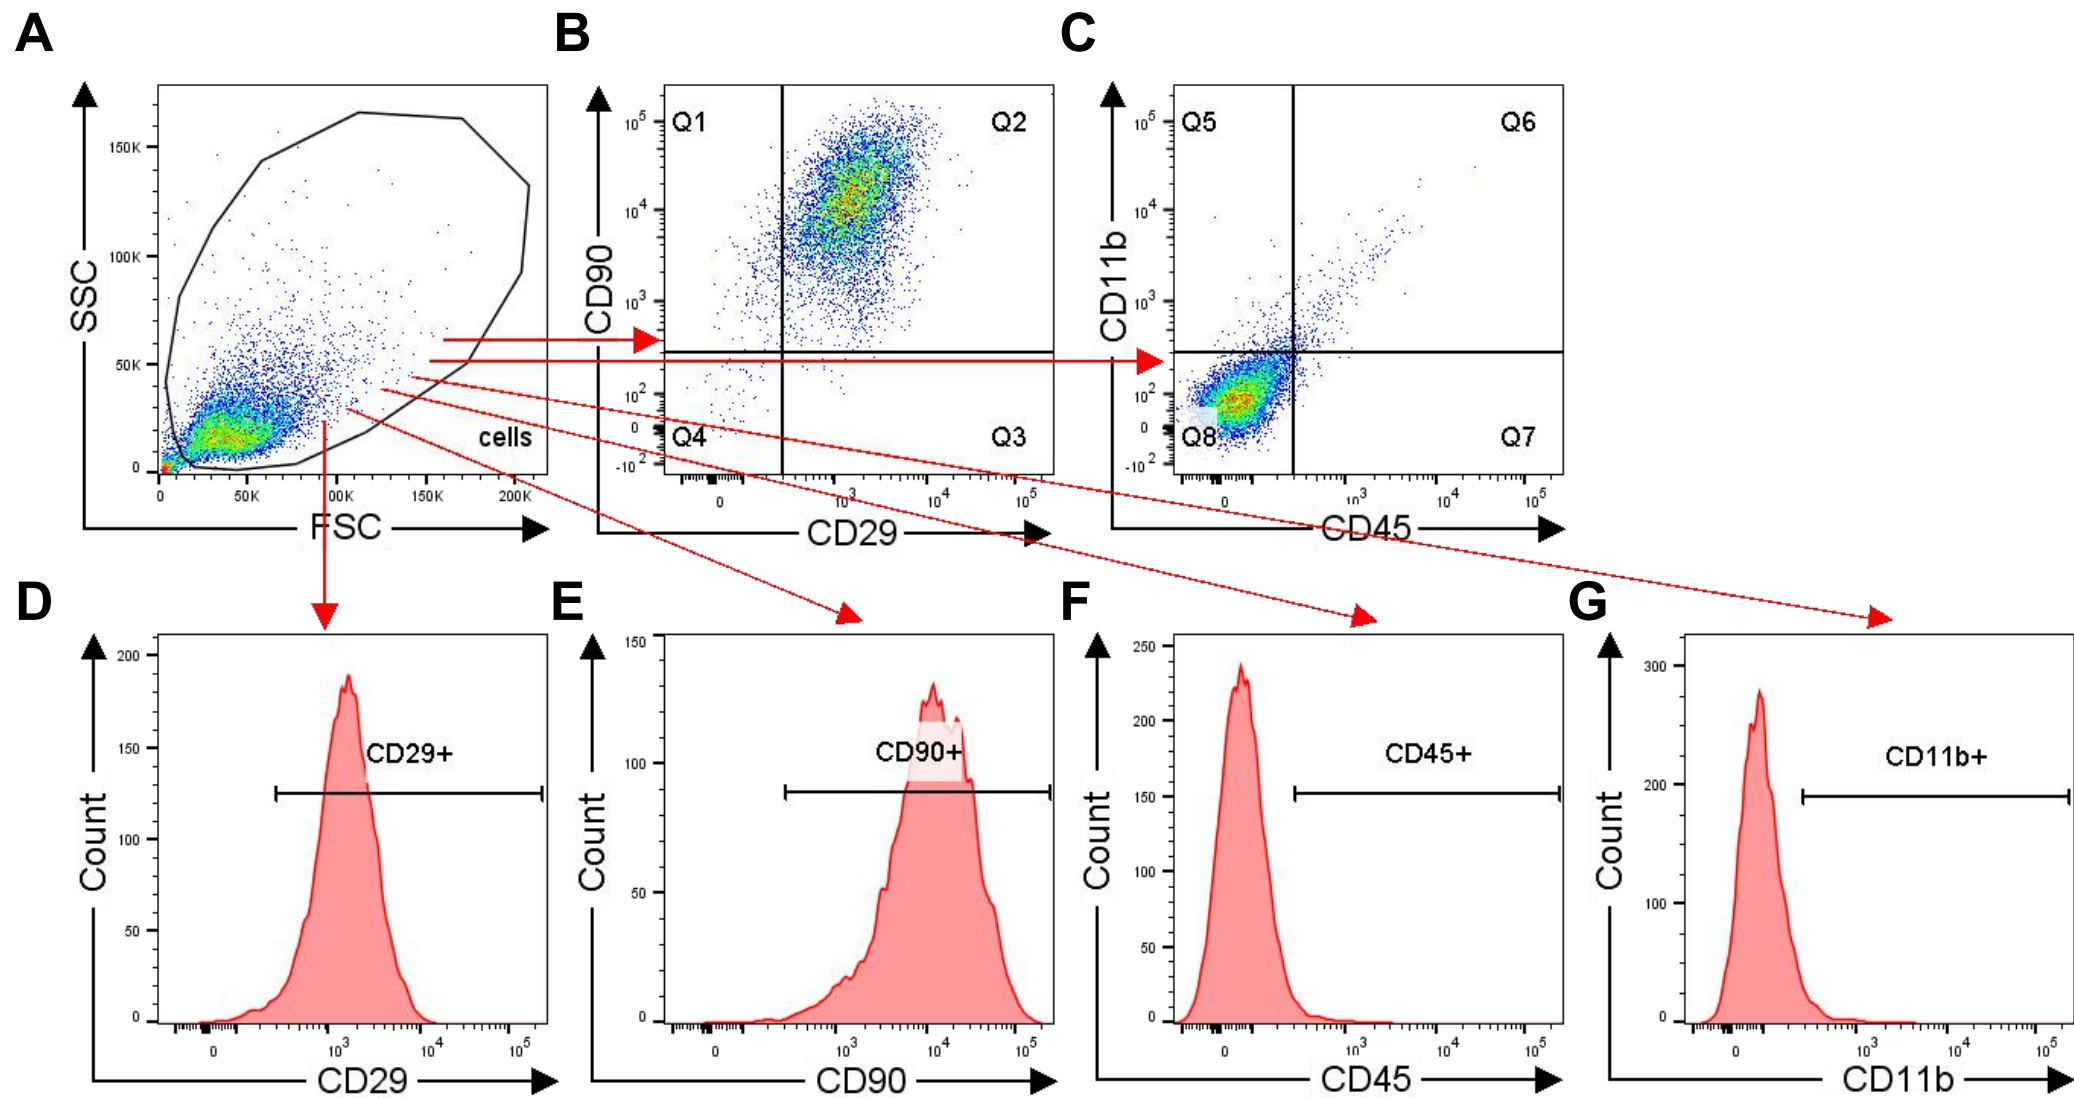

Supplement: 13287_2020_2098_MOESM1_ESM.pdf [file 13287_2020_2098_MOESM1_ESM.pdf]
